# Supplementary material
Source: HighWire-hosted journal article supplement (http://thorax.bmjjournals.com/highwire/filestream/174112/field_highwire_adjunct_files/1/Thorax_Figure_158956.pdf)

### Boys

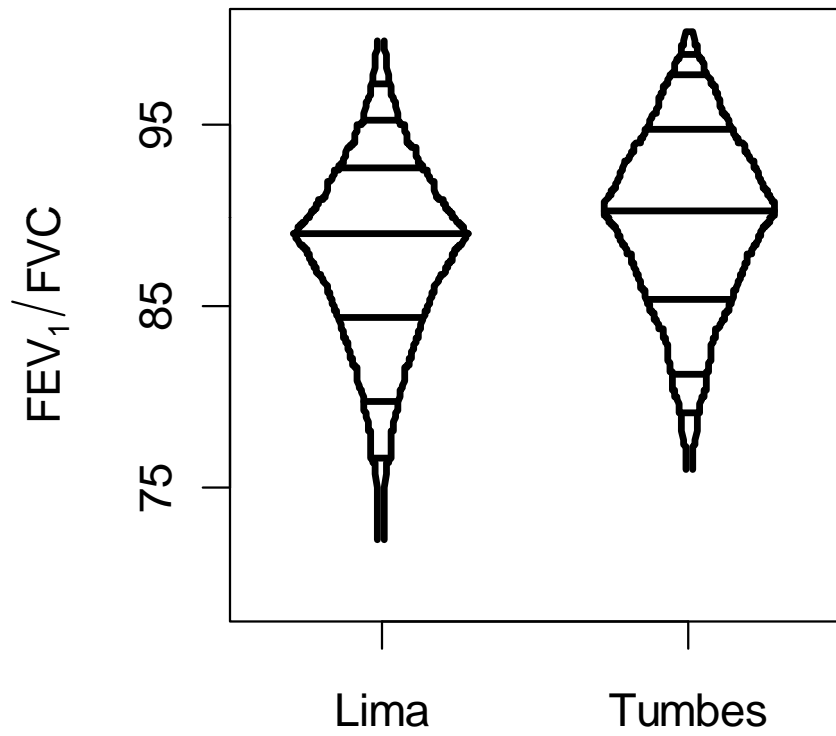

### Girls

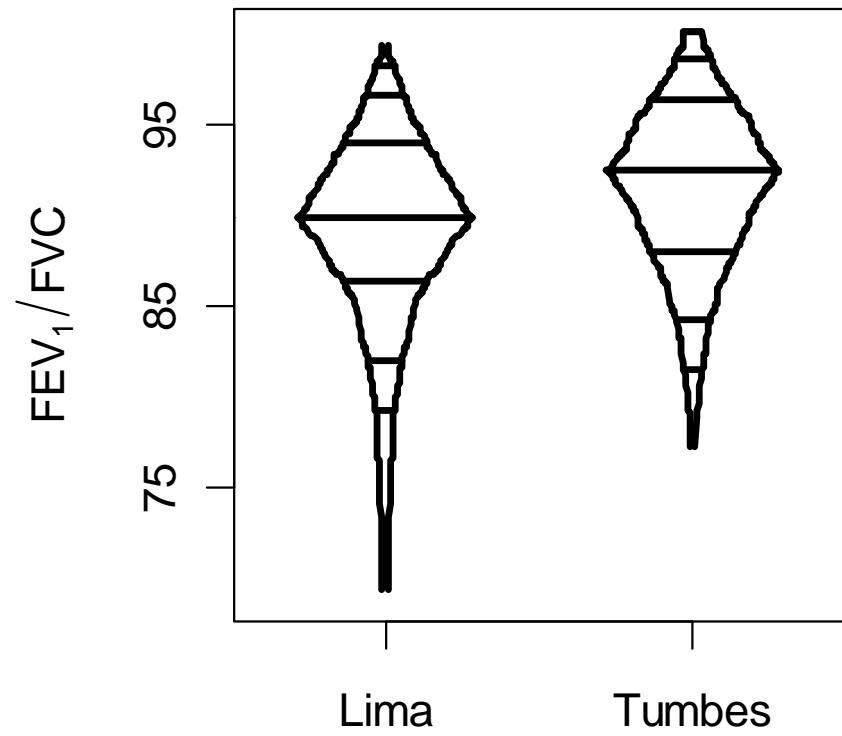

**eFigure 1.**

Supplement: Thorax_Figure_158956.pdf [file Thorax_Figure_158956.pdf]
